# Supplementary material for: High-performance adhesives modified by demethylated lignin for use in extreme environments
Source: Royal Society of Chemistry journal article supplement (doi:10.1039/d2nj06225a), 2023-01-01
Supplement: d2nj06225a1.pdf [file d2nj06225a1.pdf]

## High-performance adhesives modified by demethylated lignin for extreme environment

Shuang Zhang<sup>1</sup>, Xin Zhao<sup>1</sup>, Pengchao Chen<sup>1</sup>, Guangwei Sun<sup>1\*</sup>, Yao Li<sup>1</sup>, Ying Han<sup>1</sup>,  
Xing Wang<sup>1</sup>, Jigeng Li<sup>2</sup>

<sup>1</sup> Dalian Polytechnic University, Liaoning Key Lab of Lignocellulose Chemistry and BioMaterials, Liaoning Collaborative Innovation Center for Lignocellulosic Biorefinery

<sup>2</sup> State Key Laboratory of Pulp and Paper Engineering, South China University of Technology, Guangzhou, Guangdong 510640, China

\* Corresponding authors

Email: [sungw@dlpu.edu.cn](mailto:sungw@dlpu.edu.cn) (Guangwei Sun)

Table S1. Detailed reaction condition and name of obtained samples.

| Demethylated lignin | LiBr (g) | HBr (mL) | Time (min) | Temperature (°C) |
|---------------------|----------|----------|------------|------------------|
| DL-a-1              | 0        | 5        | 30         | 120              |
| DL-a-2              | 15       | 5        | 30         | 120              |
| DL-a-3              | 30       | 5        | 30         | 120              |
| DL-a-4              | 45       | 5        | 30         | 120              |
| DL-b-1              | 30       | 5        | 30         | 110              |
| DL-b-2              | 30       | 5        | 30         | 130              |
| DL-b-3              | 30       | 5        | 30         | 140              |
| DL-c-1              | 30       | 5        | 30         | 120              |
| DL-c-2              | 30       | 5        | 60         | 120              |
| DL-c-3              | 30       | 5        | 75         | 120              |
| DL-d-1              | 30       | 3        | 60         | 120              |
| DL-d-2              | 30       | 7        | 60         | 120              |
| DL-d-3              | 30       | 9        | 60         | 120              |

Table S2. Mass ratio of lignin epoxy resin adhesive composition and name of each adhesive

| Samples | W <sub>RLER</sub> (g) | W <sub>DLER</sub> (g) | W <sub>E-44</sub> (g) |
|---------|-----------------------|-----------------------|-----------------------|
| ERA     | 0.0                   | 0.0                   | 10.0                  |
| RLERA-1 | 1.0                   | 0.0                   | 9.0                   |
| RLERA-2 | 2.0                   | 0.0                   | 8.0                   |
| RLERA-3 | 3.0                   | 0.0                   | 7.0                   |
| RLERA-4 | 3.5                   | 0.0                   | 6.5                   |
| DLERA-1 | 0.0                   | 1.0                   | 9.0                   |
| DLERA-2 | 0.0                   | 2.0                   | 8.0                   |
| DLERA-3 | 0.0                   | 3.0                   | 7.0                   |
| DLERA-4 | 0.0                   | 3.5                   | 6.5                   |

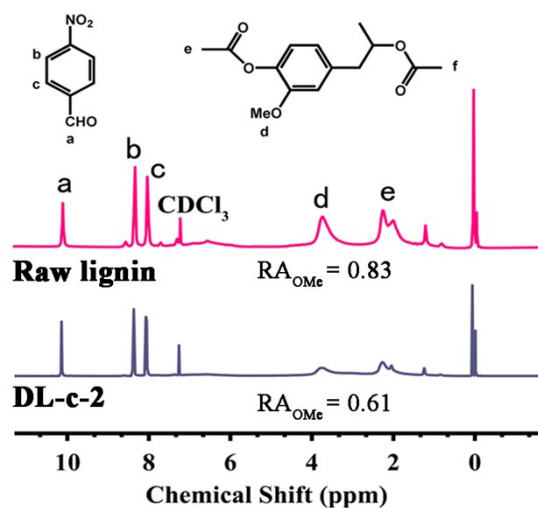

Figure S1. The quantitative  $^1\text{H}$  NMR spectra of raw lignin and DL-c-2. The illustrated structure of p-nitrobenzaldehyde and acetylated lignin unit (G type) was given, and the peaks corresponded to the  $^1\text{H}$  signal in the spectrum was marked

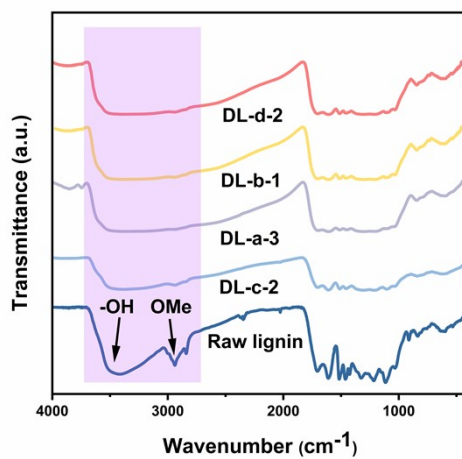

Figure S2. The FTIR spectra of raw lignin and demethylated lignin.

Table S3. The epoxy value of RLER and DLER.

| Samples      | RLER  | DLER  |
|--------------|-------|-------|
| Epoxy values | 0.363 | 0.454 |

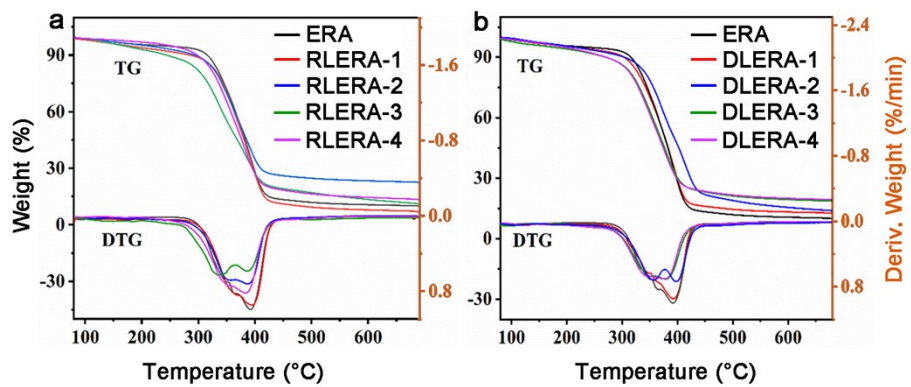

Figure S3. TG and DTG curves of ERA, RLERA and DLERA.

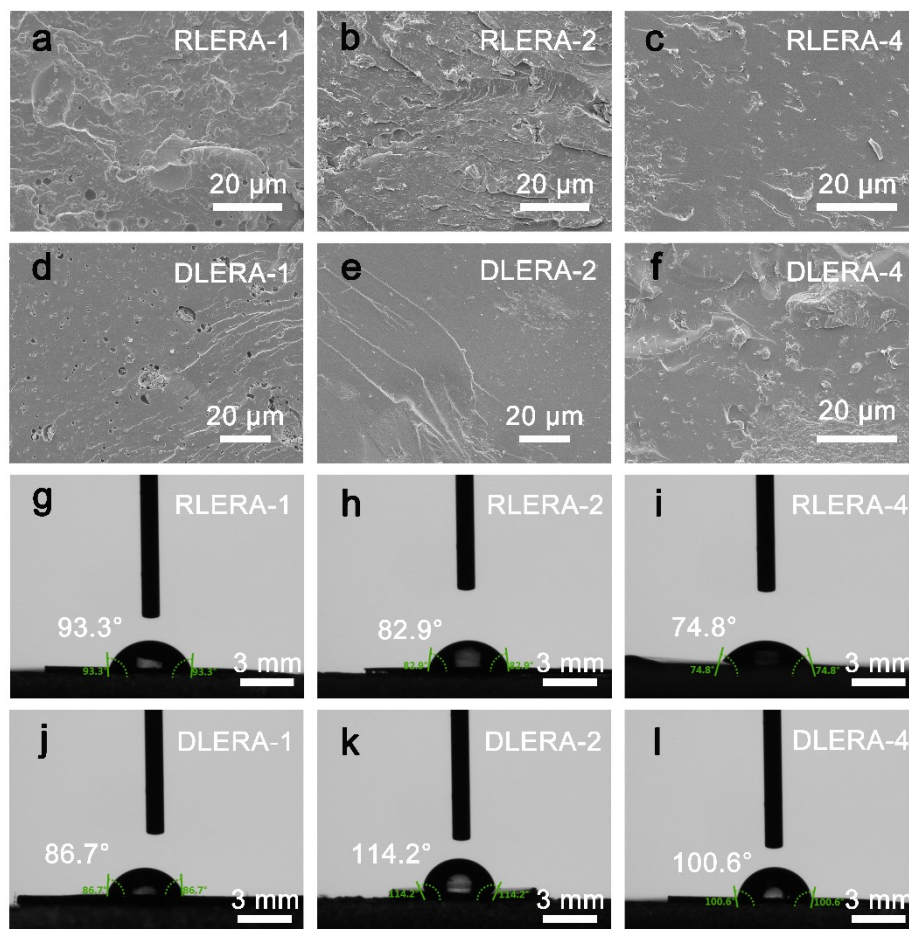

Figure S4. The SEM images of flexural fracture surfaces and the contact angle water on these prepared adhesives.

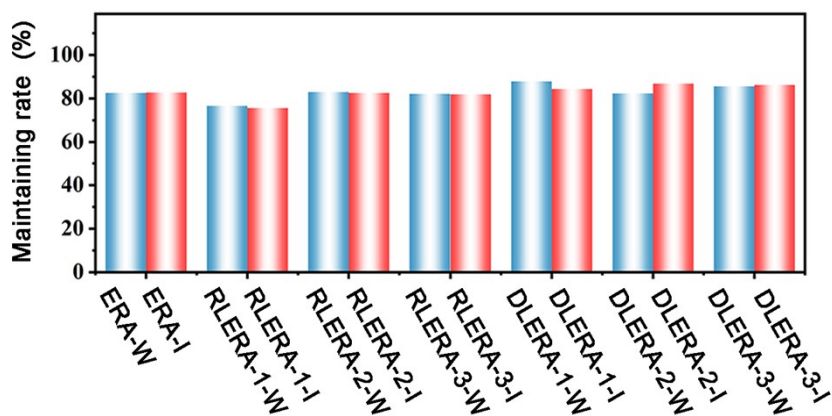

Figure S5. The maintaining property rate of ERA, RLERAs and DLERAs after bathed in the water and frozen. In addition, the sample name of X-n-W meant which was bathed in water, and the sample name of X-n-I meant which was frozen (where X is ERA, RLERAs or DLERAs; n is 1 or 2). The maintain rate was calculated by the percentage ratio of tensile shear strength under extreme conditions to tensile shear strength under mild conditions of the corresponding adhesive.



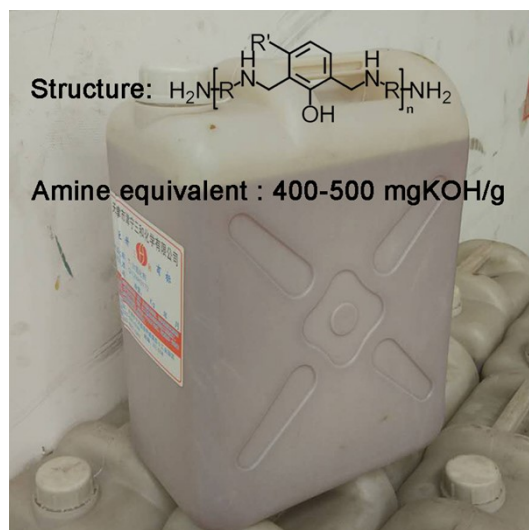

Figure S6. The possible structure schematic diagram and the amine equivalent of the used commercial curing agent (T-31).
